# Supplementary material for: Discrepant long-term nitrogen mineralization in soil at early and later period after fertilization
Source: Copernicus journal article supplement (doi:10.5194/egusphere-2024-330), 2024-03-05
Supplement: Supplementary file 1 [file egusphere-2024-330-supplement.pdf]

# 1 Supplementary Information

## 2 Table S1: Initial soil chemical properties and basic information about the six long-term 3 experiment sites.

| Sites | FAO soil classification | Original year | SOC (g·kg <sup>-1</sup> ) | TN (g·kg <sup>-1</sup> ) | AN (mg·kg <sup>-1</sup> ) | TP (g·kg <sup>-1</sup> ) | AP (mg·kg <sup>-1</sup> ) | TK (g·kg <sup>-1</sup> ) | AK (mg·kg <sup>-1</sup> ) | pH  | C/N  | Cropping system |
|-------|-------------------------|---------------|---------------------------|--------------------------|---------------------------|--------------------------|---------------------------|--------------------------|---------------------------|-----|------|-----------------|
| GZL   | Luvic Phaeozems         | 1990          | 13.2                      | 1.40                     | 114.0                     | 1.39                     | 27.0                      | 22.1                     | 190                       | 7.6 | 9.4  | MC-MMM          |
| ZZ    | Calcaric Cambisol       | 1990          | 6.7                       | 0.67                     | 76.6                      | 0.65                     | 6.5                       | 16.9                     | 74                        | 8.3 | 10.0 | DC-MW           |
| UM    | Haplic Calcisol         | 1990          | 8.8                       | 0.87                     | 55.2                      | 0.67                     | 3.4                       | 19.8                     | 288                       | 8.1 | 10.1 | MC-MWW          |
| YL    | Cumulic Anthrosol       | 1990          | 7.4                       | 0.83                     | 63.0                      | 0.61                     | 9.6                       | 21.6                     | 194                       | 8.6 | 9.0  | DC-MW           |
| ZY    | Anthrosol               | 1982          | 11.5                      | 0.86                     | 28.1                      | 0.82                     | 21.7                      | 19.8                     | 99                        | 8.5 | 13.4 | MC-MWW          |
| QY    | Eutric Cambisol         | 1990          | 7.9                       | 1.07                     | 79.0                      | 0.45                     | 13.9                      | 13.7                     | 104                       | 5.7 | 7.4  | DC-MW           |

4 GZL, Gongzhuling; ZZ, Zhengzhou; UM, Urumqi; YL, Yangling; ZY, Zhangye; QY, Qiyang; SOC, soil  
5 organic carbon; TN, total nitrogen; AN, available nitrogen; TP, total phosphorous; AP, available  
6 phosphorous; TK, total potassium; AK, available potassium; C/N, ratio of SOC with TN; MC, mono-  
7 cropping; DC, double-cropping; MMM, maize-maize-maize; MWW, maize-wheat-wheat; MW, maize-  
8 wheat.

9 **Table S2: Application rates (kg·ha<sup>-1</sup>) of fertilizer N (inorganic N + N in manure) for each growing**  
 10 **season under five treatments.**

| Sites | Experimental Periods | Crops | CK | NPK | NPKM    | hNPKM   | NPKS | Types of manure |
|-------|----------------------|-------|----|-----|---------|---------|------|-----------------|
| GZL   | 1990–2018            | Maize | 0  | 165 | 50+115  | 74+173  | 123  | CM, PM          |
| ZZ    | 1990–2011            | Maize | 0  | 188 | 188     | 282     | 188  | CM, HM          |
|       |                      | Wheat | 0  | 165 | 50+115  | 74+173  | 123  | CM, HM          |
| UM    | 1990–2011            | Maize | 0  | 242 | 85+297  | 152+595 | 217  | GM              |
|       |                      | Wheat | 0  | 242 | 85+297  | 152+595 | 217  | GM              |
| YL    | 1990–2014            | Maize | 0  | 188 | 188     | 282     | 188  | CM              |
|       |                      | Wheat | 0  | 165 | 50+115  | 74+173  | 123  | CM              |
| ZY    | 1982–1990            | Maize | 0  | 240 | 240+240 | NA      | NA   | PM              |
|       |                      | Wheat | 0  | 120 | 120+120 | NA      | NA   | PM              |
| ZY    | 1991–2002            | Maize | 0  | 300 | 300+300 | NA      | NA   | PM              |
|       |                      | Wheat | 0  | 150 | 150+150 | NA      | NA   | PM              |
| QY    | 1990–2012            | Maize | 0  | 210 | 63+147  | 95+221  | 210  | PM              |
|       |                      | Wheat | 0  | 90  | 27+63   | 41+95   | 90   | PM              |

11 GZL, Gongzhuling; ZZ, Zhengzhou; UM, Urumqi; YL, Yangling; ZY, Zhangye; QY, Qiyang. Fertilizer  
 12 regimes: CK, unfertilized control; NPK, inorganic N, phosphorus and potassium; NPKM, inorganic NPK  
 13 plus manure; hNPKM, high application rate of NPKM; NPKS, inorganic NPK with stover return; In front  
 14 and behind of the "+" represents the application rate of N from inorganic fertilizer and manure,  
 15 respectively; CM, cow manure; PM, pig manure; HM, horse manure; GM, goat manure. NA, data not  
 16 available because the treatments are not included.

17 **Table S3: Results of principal components analysis (PCA) of nutrient content and soil**  
 18 **stoichiometry in the first decade and later period of the experiment.**

| <b>Factors</b>                                         | <b>PC1</b> |
|--------------------------------------------------------|------------|
| <b>Soil nutrients of the first decade</b>              |            |
| soil total nitrogen content (TN, g· kg <sup>-1</sup> ) | -0.776**   |
| Soil available content (AN, mg· kg <sup>-1</sup> )     | -0.432*    |
| Soil total phosphorus (TP, g· kg <sup>-1</sup> )       | -0.772**   |
| Soil available phosphorus (AP, mg· kg <sup>-1</sup> )  | -0.772**   |
| Soil total potassium (TK, g· kg <sup>-1</sup> )        | 0.191      |
| Soil available potassium (AK, mg· kg <sup>-1</sup> )   | -0.661**   |
| Cumulative (%)                                         | 40.93      |
| <b>Soil stoichiometry of the first decade</b>          |            |
| C/N ratios                                             | -0.474*    |
| N/P ratios                                             | -0.944**   |
| C/P ratios                                             | -0.994**   |
| Cumulative (%)                                         | 98.67      |
| <b>Soil nutrients of the later period</b>              |            |
| soil total nitrogen content (TN, g· kg <sup>-1</sup> ) | -0.912**   |
| Soil available content (AN, mg· kg <sup>-1</sup> )     | -0.870**   |
| Soil total phosphorus (TP, g· kg <sup>-1</sup> )       | -0.915**   |
| Soil available phosphorus (AP, mg· kg <sup>-1</sup> )  | -0.936**   |
| Soil total potassium (TK, g· kg <sup>-1</sup> )        | 0.202      |
| Soil available potassium (AK, mg· kg <sup>-1</sup> )   | -0.827**   |
| Cumulative (%)                                         | 67.11      |
| <b>Soil stoichiometry of the later period</b>          |            |
| C/N ratios                                             | -0.106     |
| N/P ratios                                             | 0.971**    |
| C/P ratios                                             | 0.954**    |
| Cumulative (%)                                         | 62.18      |

19 \*, significant correlation at P < 0.05. \*\*, significant correlation at P < 0.01.

20 **Table S4: Climatic conditions (annual) in the first decade and later period at the six long-term**  
 21 **experimental sites under five treatments.**

| Sites | Years | Mean annual<br>Precipitation<br>(mm) | Mean annual<br>Temperature<br>(°C) | Mean annual<br>Humidity<br>(mm) | Mean annual<br>Evaporation<br>(mm) |
|-------|-------|--------------------------------------|------------------------------------|---------------------------------|------------------------------------|
| GZL   | 1–10  | 619.50                               | 7.37                               | 63.70                           | 1235.61                            |
|       | 11–28 | 544.68                               | 7.23                               | 62.08                           | 1390.25                            |
| ZZ    | 1–10  | 617.99                               | 14.62                              | 67.40                           | 1772.89                            |
|       | 11–22 | 682.58                               | 15.35                              | 61.42                           | 1781.65                            |
| UM    | 1–10  | 14.71                                | 14.93                              | 40.80                           | 2458.40                            |
|       | 11–22 | 15.41                                | 15.72                              | 37.33                           | 2635.45                            |
| YL    | 1–10  | 358.06                               | 8.81                               | 55.40                           | 1908.64                            |
|       | 11–25 | 457.15                               | 10.67                              | 52.33                           | 1977.20                            |
| ZY    | 1–10  | 468.85                               | 8.73                               | 65.10                           | 1331.89                            |
|       | 11–21 | 491.88                               | 9.35                               | 63.64                           | 1497.59                            |
| QY    | 1–10  | 1497.05                              | 18.00                              | 78.50                           | 1396.96                            |
|       | 11–23 | 1373.28                              | 18.25                              | 74.85                           | 1326.50                            |

22 GZL, Gongzhuling; ZZ, Zhengzhou; UM, Urumqi; YL, Yangling; ZY, Zhangye; QY, Qiyang.

23 **Table S5: Soil pH average value and coefficient variations in the first decade and the later period**  
 24 **under five long-term treatments.**

| Sites | Years | CK   |      | NPK  |      | NPKM |      | hNPKM |      | NPKS |      |
|-------|-------|------|------|------|------|------|------|-------|------|------|------|
|       |       | pH   | CV   | pH   | CV   | pH   | CV   | pH    | CV   | pH   | CV   |
| GZL   | 1–10  | 7.60 | 0.02 | 6.60 | 0.05 | 7.48 | 0.01 | 7.64  | 0.02 | 7.89 | 0.02 |
|       | 11–28 | 7.56 | 0.03 | 6.20 | 0.03 | 7.21 | 0.02 | 7.31  | 0.01 | 7.61 | 0.04 |
| ZZ    | 1–10  | 8.57 | 0.03 | 8.42 | 0.01 | 8.42 | 0.01 | 8.23  | 0.02 | 8.25 | 0.02 |
|       | 11–22 | 8.35 | 0.03 | 8.34 | 0.03 | 8.27 | 0.03 | 8.22  | 0.03 | 8.29 | 0.03 |
| UM    | 1–10  | 8.10 | 0.03 | 8.01 | 0.04 | 7.92 | 0.04 | 7.83  | 0.04 | 7.74 | 0.04 |
|       | 11–22 | 7.65 | 0.01 | 7.56 | 0.02 | 7.47 | 0.02 | 7.38  | 0.02 | 7.29 | 0.02 |
| YL    | 1–10  | 8.23 | 0.03 | 8.23 | 0.04 | 8.10 | 0.04 | 8.07  | 0.04 | 8.06 | 0.04 |
|       | 11–25 | 8.38 | 0.01 | 8.26 | 0.02 | 8.10 | 0.02 | 8.03  | 0.02 | 8.20 | 0.02 |
| ZY    | 1–10  | 8.50 | 0.00 | 8.50 | 0.00 | 8.50 | 0.00 | NA    | NA   | NA   | NA   |
|       | 11–21 | 8.50 | 0.00 | 8.50 | 0.00 | 8.50 | 0.00 | NA    | NA   | NA   | NA   |
| QY    | 1–10  | 5.76 | 0.08 | 5.01 | 0.11 | 6.03 | 0.07 | 6.01  | 0.04 | 5.00 | 0.11 |
|       | 11–23 | 5.68 | 0.03 | 4.50 | 0.03 | 5.82 | 0.03 | 5.85  | 0.03 | 4.57 | 0.05 |

25 CV, coefficient of variation. NA, data not available because the treatments are not included.

26 **Table S6: Annual rates of change (ARC,  $\text{g}\cdot\text{kg}^{-1}\cdot\text{yr}^{-1}$ ) of SOC in the first decade and later period**  
 27 **under five long-term treatments.**

| Sites | Years | CK     | NPK    | NPKM   | hNPKM  | NPKS   |
|-------|-------|--------|--------|--------|--------|--------|
| GZL   | 1–10  | 0.08   | 0.10   | 0.16   | 0.26   | 0.09*  |
|       | 11–28 | -0.23  | -0.38* | 0.15   | 0.29   | -0.09  |
| ZZ    | 1–10  | -0.03  | 0.05   | 0.22** | 0.28** | 0.13*  |
|       | 11–22 | 0.10   | 0.09*  | 0.23** | 0.33** | 0.15** |
| UM    | 1–10  | -0.12* | -0.04  | 0.24   | 0.44** | 0.05   |
|       | 11–22 | 0.58** | 0.66*  | 1.27*  | 2.16** | 0.49*  |
| YL    | 1–10  | 0.19*  | 0.29** | 0.67** | 1.03*  | 0.29*  |
|       | 11–25 | 0.09*  | 0.20   | 0.24   | 0.00   | 0.31** |
| ZY    | 1–10  | -0.19  | -0.05  | 0.00   | NA     | NA     |
|       | 11–21 | -0.23  | -0.19  | 0.03   | NA     | NA     |
| QY    | 1–10  | 0.05   | 0.27*  | 0.62** | 1.02** | 0.31*  |
|       | 11–23 | -0.07  | -0.12  | -0.18  | -0.29  | -0.13  |

28 NA, data not available because the treatments are not included; \*, significant correlation at  $P < 0.05$ . \*\*,  
 29 significant correlation at  $P < 0.01$ .
